# Supplementary material for: Spermatid-specific linker histone HILS1 is a poor condenser of DNA and chromatin and preferentially associates with LINE-1 elements
Source: Epigenetics Chromatin. 2018 Aug 1;11:43. doi: 10.1186/s13072-018-0214-0 (PMC6069787; doi:10.1186/s13072-018-0214-0)
Supplement: Supplementary file 5 — Additional file 5: Table S4. ChIP peaks (32731) overlapping with UCSC CpG islands. List of CpG islands were obtained from UCSC table browser and used to find overlaps with 32731 HILS1 ChIP peaks using Bed tools Intersect. [file 13072_2018_214_MOESM5_ESM.xlsx]

## Sheet: Sheet1
PeakID..cmd.annotatePeaks.pl.common_new.bed.rn5..annStats.annstat.	Chr	Start	End	Length	CpG	-10*log10(pvalue)	fold_enrichment	LOG2_Fold	FDR...	Annotation	Detailed.Annotation	Distance.to.TSS	Nearest.PromoterID	Entrez.ID	Nearest.Unigene	Nearest.Refseq	Nearest.Ensembl	Gene.Name	Gene.Alias	Gene.Description	Gene.Type
MACS_peak_640	chr1	28450607	28451311	704	CpG:_36	229.57	14.81	3.8885	8.63	Intergenic	Intergenic	-1151019	NM_021666	59299	Rn.41863	NM_021666	ENSRNOG00000012609	Trdn	-	triadin	protein-coding
MACS_peak_4379	chr1	187485993	187486584	591	CpG:_30	231.61	23.15	4.53294	8.57	Intergenic	SATI_RN|Satellite|Satellite	-1507838	NM_001013434	365355	Rn.3271	NM_001013434	ENSRNOG00000012258	Rras2	-	related RAS viral (r-ras) oncogene homolog 2	protein-coding
MACS_peak_8407	chr12	344726	345542	816	CpG:_58	385.08	15.74	3.97636	7.3	Intergenic	NICER1E_Rn_LTR|LTR|ERV1	-145891	NM_031542	360254	Rn.103225	NM_031542	ENSRNOG00000001111	Brca2	-	BRCA2, DNA repair associated	protein-coding
MACS_peak_10450	chr13	94070869	94071655	786	CpG:_68	248.25	22.22	4.47379	8.29	Intergenic	CpG	-36297	NM_001109075	498278	Rn.7902	NM_001109075	ENSRNOG00000034221	Cfap126	RGD1562658	cilia and flagella associated protein 126	protein-coding
MACS_peak_10473	chr13	95677720	95681487	3767	CpG:_23	2086.08	33.33	5.05875	8.19	Intergenic	tRNA-Glu-GAG_|tRNA|tRNA	-1349	NM_053843	116591	Rn.6050	NM_053843	ENSRNOG00000046663	Fcgr2a	Fcgr3|Fcgr3a	Fc fragment of IgG, low affinity IIa, receptor	protein-coding
MACS_peak_10474	chr13	95722008	95722601	593	CpG:_28	210.64	19.44	4.28096	9.01	Intergenic	Intergenic	-24766	NM_001135992	498276	Rn.6050	NM_001135992		LOC498276	-	Fc gamma receptor II beta	protein-coding
MACS_peak_10476	chr13	95732406	95733051	645	CpG:_28	316.22	25.92	4.69599	7.59	Intergenic	CpG	15800	NM_001135992	498276	Rn.6050	NM_001135992		LOC498276	-	Fc gamma receptor II beta	protein-coding
MACS_peak_11175-2	chr14	46742003	46744045	2042	CpG:_91	3100	75	6.22882	9.45	Intergenic	CpG	-71973	NM_001025002	310926		NM_001025002		LOC310926	Aa1011|Aa1262|Ab2-057|Ac1147	hypothetical protein LOC310926	protein-coding
MACS_peak_11179	chr14	46757044	46758903	1859	CpG:_59	3100	97.22	6.60318	9.45	Intergenic	Intergenic	-57024	NM_001025002	310926		NM_001025002		LOC310926	Aa1011|Aa1262|Ab2-057|Ac1147	hypothetical protein LOC310926	protein-coding
MACS_peak_11182	chr14	46768095	46769118	1023	CpG:_28	992.22	44.44	5.47379	7.11	Intergenic	(TCTA)n|Simple_repeat|Simple_repeat	-46391	NM_001025002	310926		NM_001025002		LOC310926	Aa1011|Aa1262|Ab2-057|Ac1147	hypothetical protein LOC310926	protein-coding
MACS_peak_11188	chr14	46814032	46817965	3933	CpG:_767	3100	77.77	6.28114	9.45	exon (NM_001025002, exon 2 of 7)	exon (NM_001025002, exon 2 of 7)	1001	NM_001025002	310926		NM_001025002		LOC310926	Aa1011|Aa1262|Ab2-057|Ac1147	hypothetical protein LOC310926	protein-coding
MACS_peak_11188-2	chr14	46818013	46820430	2417	CpG:_767	3100	77.77	6.28114	9.45	intron (NM_001025002, intron 2 of 6)	SSU-rRNA_Hsa|rRNA|rRNA	-1768	NR_046239	24723		NR_046239		Rn45s	-	45S pre-ribosomal RNA	rRNA
MACS_peak_11196	chr14	46858644	46860169	1525	CpG:_397	3100	70.37	6.13689	9.45	intron (NM_001025002, intron 6 of 6)	SSU-rRNA_Hsa|rRNA|rRNA	-3181	NR_046238	100861534		NR_046238	ENSRNOG00000059852	Rn5-8s	-	5.8S ribosomal RNA	rRNA
MACS_peak_11197	chr14	46860470	46861824	1354	CpG:_219	3100	76.85	6.26397	9.45	exon (NM_001025002, exon 7 of 7)	exon (NM_001025002, exon 7 of 7)	-1440	NR_046238	100861534		NR_046238	ENSRNOG00000059852	Rn5-8s	-	5.8S ribosomal RNA	rRNA
MACS_peak_11198	chr14	46862159	46863108	949	CpG:_219	1433.9	61.11	5.93334	7.4	promoter-TSS (NR_046238).4	promoter-TSS (NR_046238).4	46	NR_046238	100861534		NR_046238	ENSRNOG00000059852	Rn5-8s	-	5.8S ribosomal RNA	rRNA
MACS_peak_11199	chr14	46863252	46863861	609	CpG:_219	415.67	30.55	4.9331	7.25	TTS (NR_046238).4	TTS (NR_046238).4	969	NR_046238	100861534		NR_046238	ENSRNOG00000059852	Rn5-8s	-	5.8S ribosomal RNA	rRNA
MACS_peak_11976	chr14	94162909	94163659	750	CpG:_49	261.36	17.59	4.13668	8.08	Intergenic	CpG	-1870595	NM_001107236	305497	Rn.114948	NM_001107236	ENSRNOG00000004281	Cobl	-	cordon-bleu WH2 repeat protein	protein-coding
MACS_peak_15722	chr16	65867198	65867889	691	CpG:_49	286.44	24.07	4.58916	7.84	Intergenic	Intergenic	-813400	NM_001107319	306534	Rn.231130	NM_001107319	ENSRNOG00000011858	Unc5d	-	unc-5 netrin receptor D	protein-coding
MACS_peak_16794-3	chr17	59051071	59052990	1919	CpG:_45	1803.51	27.78	4.79597	7.68	Intergenic	SATI_RN|Satellite|Satellite	-103616	NM_022686	64627	Rn.1659	NM_022686	ENSRNOG00000054017	Hist1h4b	H1ft|Hist4|Hist4h4	histone cluster 1, H4b	protein-coding
MACS_peak_18552	chr19	5824789	5825665	876	CpG:_32	1432.31	50	5.64386	7.39	Intergenic	CpG	-199187	NM_053393	84408	Rn.214220	NM_053393	ENSRNOG00000056643	Cdh8	-	cadherin 8	protein-coding
MACS_peak_18553	chr19	5825908	5827336	1428	CpG:_69	3100	107.4	6.74685	9.45	Intergenic	CpG	-197792	NM_053393	84408	Rn.214220	NM_053393	ENSRNOG00000056643	Cdh8	-	cadherin 8	protein-coding
MACS_peak_19619-3	chr2	537159	538147	988	CpG:_111	779.78	15.74	3.97636	6.83	Intergenic	CpG	-843464	NM_030836	80897	Rn.22516	NM_030836	ENSRNOG00000009997	Erap1	Appils|Arts1	endoplasmic reticulum aminopeptidase 1	protein-coding
MACS_peak_19731	chr2	887551	888463	912	CpG:_16	147.66	12.96	3.69599	11.96	Intergenic	SSU-rRNA_Hsa|rRNA|rRNA	-493110	NM_030836	80897	Rn.22516	NM_030836	ENSRNOG00000009997	Erap1	Appils|Arts1	endoplasmic reticulum aminopeptidase 1	protein-coding
MACS_peak_20897	chr2	71023278	71023742	464	CpG:_82	138.39	9.26	3.21101	12.68	Intergenic	Intergenic	-128630	NM_001100698	310375	Rn.92641	NM_001100698	ENSRNOG00000015925	Zfp131	-	zinc finger protein 131	protein-coding
MACS_peak_23072	chr2	172491033	172491639	606	CpG:_22	124.53	13.89	3.79597	14.01	Intergenic	CpG	-183838	NM_138891	192251	Rn.96392	NM_138891	ENSRNOG00000014793	Gpr149	Ieda	G protein-coupled receptor 149	protein-coding
MACS_peak_24607	chr2	211291932	211293187	1255	CpG:_21	370.47	18.52	4.21101	7.32	Intergenic	Intergenic	-242429	NM_001109500	688413	Rn.133217	NM_001109500	ENSRNOG00000009581	Lce1m	-	late cornified envelope 1M	protein-coding
MACS_peak_25712	chr20	6872629	6873273	644	CpG:_103	101.89	12.96	3.69599	16.87	promoter-TSS (NM_001033985)	promoter-TSS (NM_001033985)	-295	NM_001008835	309600	Rn.128939	NM_001008835		RT1-CE12	-	RT1 class I, locus CE12	protein-coding
MACS_peak_31482	chr5	2324254	2324992	738	CpG:_32	125.25	12.96	3.69599	13.89	intron (NM_001007150, intron 1 of 6)	CpG	17877	NM_001007150	171500	Rn.73714	NM_134466		Stau2	-	staufen double-stranded RNA binding protein 2	protein-coding
MACS_peak_33499	chr5	126926022	126926541	519	CpG:_105	147.6	22.22	4.47379	11.96	Intergenic	LSU-rRNA_Hsa|rRNA|rRNA	211524	NM_001106669	298282	Rn.14712	NM_001106669	ENSRNOG00000007214	Oma1	RGD1304821	OMA1 zinc metallopeptidase	protein-coding
MACS_peak_34349	chr6	38851206	38854531	3325	CpG:_69	3100	66.66	6.05875	9.45	Intergenic	Intergenic	-118546	NM_001108012	313929	Rn.165307	NM_001108012	ENSRNOG00000004068	Ncoa1	SRC-1	nuclear receptor coactivator 1	protein-coding
MACS_peak_34393	chr6	39259602	39263592	3990	CpG:_61	3100	78.7	6.29829	9.45	Intergenic	Intergenic	10303	NR_046238	100861534		NR_046238	ENSRNOG00000059852	Rn5-8s	-	5.8S ribosomal RNA	rRNA
MACS_peak_34397-3	chr6	39270330	39274222	3892	CpG:_275	3100	86.11	6.42811	9.45	promoter-TSS (NR_046238).7	promoter-TSS (NR_046238).7	-376	NR_046238	100861534		NR_046238	ENSRNOG00000059852	Rn5-8s	-	5.8S ribosomal RNA	rRNA
MACS_peak_34397	chr6	39274309	39275605	1296	CpG:_82	3100	86.11	6.42811	9.45	Intergenic	Intergenic	-3057	NR_046238	100861534		NR_046238	ENSRNOG00000059852	Rn5-8s	-	5.8S ribosomal RNA	rRNA
MACS_peak_36199	chr7	736890	737483	593	CpG:_70	90.58	9.26	3.21101	18.75	Intergenic	CpG	-396803	NM_001109460	685180	Rn.198434	NM_001109460		Stx19	-	syntaxin 19	protein-coding
MACS_peak_36297	chr7	1610265	1610908	643	CpG:_129	100.8	12.04	3.58976	17.05	Intergenic	CpG	410722	NM_031086	81750	Rn.2888	NM_031086	ENSRNOG00000048723	Pros1	Pros	protein S (alpha)	protein-coding
MACS_peak_37160-2	chr7	22221885	22222648	763	CpG:_91	1258.71	20.37	4.34837	7.31	Intergenic	SSU-rRNA_Hsa|rRNA|rRNA	877372	NM_001099474	299683	Rn.198782	NM_001099474	ENSRNOG00000039136	Vom2r57	RGD1562007	vomeronasal 2 receptor, 57	protein-coding
MACS_peak_37219	chr7	22617201	22620165	2964	CpG:_47	870.05	27.78	4.79597	7.01	Intergenic	Lx|LINE|L1	480955	NM_001099474	299683	Rn.198782	NM_001099474	ENSRNOG00000039136	Vom2r57	RGD1562007	vomeronasal 2 receptor, 57	protein-coding
MACS_peak_40708-2	chr9	1391694	1392230	536	CpG:_57	1346.44	36.11	5.17433	7.28	intron (NM_001134762, intron 4 of 21)	CpG	285525	NM_001134762	501088	Rn.203950	NM_001134762	ENSRNOG00000010637	Tbc1d5	RGD1561626	TBC1 domain family, member 5	protein-coding
MACS_peak_41061-2	chr9	6514990	6517207	2217	CpG:_67	1209.28	25	4.64386	7.22	Intergenic	SSU-rRNA_Hsa|rRNA|rRNA	-176771	NM_001099505	301154	Rn.217862	NM_001099505	ENSRNOG00000045587	Vom2r76	-	vomeronasal 2 receptor, 76	protein-coding
MACS_peak_41122	chr9	7322053	7322877	824	CpG:_22	1325.54	49.07	5.61677	7.34	Intergenic	Intergenic	226301	NM_001007558	450235	Rn.162355	NM_001007558	ENSRNOG00000050325	Adgre4	Adgre4p|Emr4|Emr4p	adhesion G protein-coupled receptor E4	protein-coding
MACS_peak_41141	chr9	7413719	7414883	1164	CpG:_47	475.58	32.41	5.01837	7.2	Intergenic	CpG	318137	NM_001007558	450235	Rn.162355	NM_001007558	ENSRNOG00000050325	Adgre4	Adgre4p|Emr4|Emr4p	adhesion G protein-coupled receptor E4	protein-coding
MACS_peak_41155	chr9	7456707	7459566	2859	CpG:_56	3100	48.15	5.58946	9.45	Intergenic	Intergenic	361972	NM_001007558	450235	Rn.162355	NM_001007558	ENSRNOG00000050325	Adgre4	Adgre4p|Emr4|Emr4p	adhesion G protein-coupled receptor E4	protein-coding
MACS_peak_41172	chr9	7528168	7528628	460	CpG:_41	261.45	25.92	4.69599	8.07	Intergenic	CpG	432234	NM_001007558	450235	Rn.162355	NM_001007558	ENSRNOG00000050325	Adgre4	Adgre4p|Emr4|Emr4p	adhesion G protein-coupled receptor E4	protein-coding
MACS_peak_41238	chr9	7850475	7851999	1524	CpG:_38	364.44	12.96	3.69599	7.33	Intergenic	CpG	296141	NM_001025755	367620	Rn.155021	NM_001025755	ENSRNOG00000033341	MGC116197	RGD1563862	similar to RIKEN cDNA 1700001E04	protein-coding
MACS_peak_41449	chr9	11058741	11059381	640	CpG:_25	749.96	44.44	5.47379	6.84	Intergenic	Intergenic	-515964	NM_001109414	680486	Rn.136288	NM_001109414	ENSRNOG00000023474	Dazl	-	deleted in azoospermia-like	protein-coding
MACS_peak_41502-2	chr9	11334493	11337618	3125	CpG:_52	3100	47.22	5.56133	9.45	Intergenic	(TC)n|Simple_repeat|Simple_repeat	-238970	NM_001109414	680486	Rn.136288	NM_001109414	ENSRNOG00000023474	Dazl	-	deleted in azoospermia-like	protein-coding
MACS_peak_41503	chr9	11340474	11340986	512	CpG:_35	303.1	31.48	4.97636	7.65	Intergenic	CpG	-234295	NM_001109414	680486	Rn.136288	NM_001109414	ENSRNOG00000023474	Dazl	-	deleted in azoospermia-like	protein-coding
MACS_peak_46190	chrX	145891034	145891775	741	CpG:_105	164.93	12.96	3.69599	10.81	Intergenic	CpG	510741	NM_001025713	317590	Rn.8063	NM_001025713	ENSRNOG00000026265	Magec2	-	MAGE family member C2	protein-coding
